# Supplementary material
Source: ML conference proceedings conference paper supplement (https://openaccess.thecvf.com/content/CVPR_2019/html/Liu_Neural_RGBrD_Sensing_CVPR_2019_paper.html)
Supplement: Supplementary file 1 [file supp.pdf › supp/supp.pdf]

# Neural RGB→D Sensing: Depth and Uncertainty from a Video Camera

## \*Supplementary Document\*

Chao Liu<sup>1,2\*</sup>   Jinwei Gu<sup>1,3\*</sup>   Kihwan Kim<sup>1</sup>   Srinivasa G. Narasimhan<sup>2</sup>   Jan Kautz<sup>1</sup>  
<sup>1</sup>NVIDIA   <sup>2</sup>Carnegie Mellon University   <sup>3</sup>SenseTime

### 1. Relation of K-Net to the Kalman filter

The proposed update process defined in Eq. 8 in the main paper using residuals is closely related to Kalman Filter. In Kalman Filter, given the observation  $x_t$  at time  $t$  and the estimated hidden state  $h_{t-1}$  at time  $t-1$ , the updated hidden state  $h_t$  is:

$$h_t = W_t h_{t-1} + K_t(x_t - V_t W_t h_{t-1}) \quad (1)$$

where  $W_t$  is the transition matrix mapping the previous hidden state to current state;  $K_t$  is the gain matrix mapping the residual in the observation space to the hidden state space.  $V_t$  is the measurement matrix mapping the estimation in the hidden state space back to the observation space.

If we assume the measurement matrix is accurate:  $x_t = V h_t$ , and the gain and measurement matrices are temporally invariant, we have:

$$\begin{aligned} h_t &= W_t h_{t-1} + K(V h_t - V W_t h_{t-1}) \\ &= W_t h_{t-1} + K V(h_t - W_t h_{t-1}) \end{aligned} \quad (2)$$

Comparing our proposed update process in Eq. 5, Eq. 8 and Eq. 9 in the main paper and Kalman Filter in Eq. 2, in our case the input images correspond to the observations  $x_t$ ; the negative-log depth probabilities correspond to the hidden states  $h_t$ ; the warping operator  $\text{warp}(\cdot)$  corresponds to the transition matrix  $W_t$ ; the K-Net  $g(\cdot)$  corresponds to the multiplication of the gain and measurement matrices  $KV$  in Eq. 2.

## 2. More Results

### 2.1. Complete metrics for Comparisons

We show the complete metrics for depth estimation comparisons in Table 1 and Table 2.

### 2.2. Results on KITTI without GPS or IMU

In Table 3, we show the performance of our method on the KITTI dataset, in case where only the IMU measurement are available (denoted as 'GT R'), and neither IMU nor GPU are available (denoted as 'opt. pose').

\*The authors contributed on this work when they were at NVIDIA.

### 3. Network structures

In this section, we illustrate the network structures used in the pipeline.

#### 3.1. D-Net

We show the structure of the D-Net in Table. 6. In the paper, we set  $D = 64$ .

#### 3.2. K-Net

We show the structure of the K-Net in Table. 4. In the paper, we set  $D = 64$ .

#### 3.3. R-Net

We show the structure of the R-Net in Table. 5. In the paper, we set  $D = 64$ .

Table 1: Comparison of depth estimation over the 7-Scenes dataset [6] with the metrics defined in [2]

|            | $\sigma < 1.25$ | $\sigma < 1.25^2$ | $\sigma < 1.25^3$ | abs. rel      | sq. rel       | rmse          | rmse log      | scale. inv    |
|------------|-----------------|-------------------|-------------------|---------------|---------------|---------------|---------------|---------------|
| DeMoN [7]  | 31.88           | 61.02             | 82.52             | 0.3888        | 0.4198        | 0.8549        | 0.4771        | 0.4473        |
| MVSNet [8] | 54.87           | 72.60             | 84.80             | 0.3481        | 0.4819        | 0.8305        | 0.4470        | 0.3743        |
| DORN [3]   | 60.05           | 87.76             | 96.33             | 0.2000        | 0.1153        | 0.4591        | 0.2813        | 0.2207        |
| Ours       | <b>69.26</b>    | <b>91.77</b>      | <b>96.82</b>      | <b>0.1758</b> | <b>0.1123</b> | <b>0.4408</b> | <b>0.2500</b> | <b>0.1899</b> |

Table 2: Comparison of depth estimation over the KITTI dataset [4].

|           | $\sigma < 1.25$ | $\sigma < 1.25^2$ | $\sigma < 1.25^3$ | abs. rel      | sq. rel       | rmse          | rmse log      | scale. inv    |
|-----------|-----------------|-------------------|-------------------|---------------|---------------|---------------|---------------|---------------|
| Eigen [2] | 67.80           | 88.79             | 96.51             | 0.1904        | 1.263         | 5.114         | 0.2758        | 0.2628        |
| Mono [5]  | 86.43           | 97.70             | <b>99.47</b>      | 0.1238        | 0.5023        | 2.8684        | 0.1644        | 0.1635        |
| DORN [3]  | 92.62           | <b>98.18</b>      | 99.35             | <b>0.0874</b> | <b>0.4134</b> | 3.1375        | 0.1337        | 0.1233        |
| Ours      | <b>93.15</b>    | 98.018            | 99.25             | 0.0998        | 0.4732        | <b>2.8294</b> | <b>0.1280</b> | <b>0.1070</b> |

Table 3: Performance on KITTI dataset without GPS/IMU measurements

|           | $\sigma < 1.25$ | $\sigma < 1.25^2$ | $\sigma < 1.25^3$ | abs. rel | sq. rel | rmse   | rmse log | scale. inv |
|-----------|-----------------|-------------------|-------------------|----------|---------|--------|----------|------------|
| GT R      | 89.34           | 98.30             | 99.64             | 0.1178   | 0.4490  | 3.2042 | 0.1514   | 0.1509     |
| opt. pose | 87.78           | 97.22             | 99.10             | 0.1201   | 0.5763  | 3.5157 | 0.1672   | 0.1665     |

Table 4: K-Net structure. The operator expand( $\cdot$ ) repeat the image intensity in the depth dimension

| Name   | Components                                                                        | Input  | Output dimension                                      |
|--------|-----------------------------------------------------------------------------------|--------|-------------------------------------------------------|
| Input  | concat(cost_volume, expand( $I_{ref}$ ))                                          |        | $\frac{1}{4}H \times \frac{1}{4}W \times D \times 4$  |
| conv_0 | conv_3d(3×3, ch_in=4, ch_out=32), ReLU<br>conv_3d(3×3, ch_in=32, ch_out=32), ReLU | Input  | $\frac{1}{4}H \times \frac{1}{4}W \times D \times 32$ |
| conv_1 | conv_3d(3×3, ch_in=32, ch_out=32), ReLU<br>conv_3d(3×3, ch_in=32, ch_out=32)      | conv_0 | $\frac{1}{4}H \times \frac{1}{4}W \times D \times 32$ |
| conv_2 | conv_3d(3×3, ch_in=32, ch_out=32), ReLU<br>conv_3d(3×3, ch_in=32, ch_out=1)       | conv_1 | $\frac{1}{4}H \times \frac{1}{4}W \times D \times 1$  |
| Output | Modified cost_volume from the conv_2 layer                                        |        | $\frac{1}{4}H \times \frac{1}{4}W \times D \times 1$  |

Table 5: R-Net structure

| Name         | Components                                                                                                                        | Input                                 | Output dimension                                 |
|--------------|-----------------------------------------------------------------------------------------------------------------------------------|---------------------------------------|--------------------------------------------------|
| Input        | cost_volume from K-Net                                                                                                            |                                       | $\frac{1}{4}H \times \frac{1}{4}W \times D$      |
| conv_0       | conv_2d(3×3, ch_in=64+D, ch_out=64+D), LeakyReLU<br>conv_2d(3×3, ch_in=64+D, ch_out=64+D), LeakyReLU                              | concat(Input, fusion in D-Net)        | $\frac{1}{4}H \times \frac{1}{4}W \times (64+D)$ |
| trans_conv_0 | transpose_conv(4×4, ch_in=64+D, ch_out=D, stride=2),<br>LeakyReLU                                                                 | conv_0                                | $\frac{1}{2}H \times \frac{1}{2}W \times D$      |
| conv_1       | conv_2d(3×3, ch_in=32+D, ch_out=32+D), LeakyReLU<br>conv_2d(3×3, ch_in=32+D, ch_out=32+D), LeakyReLU                              | concat(trans_conv_0, conv_1 in D-Net) | $\frac{1}{2}H \times \frac{1}{2}W \times (D+32)$ |
| trans_conv_1 | transpose_conv(4×4, ch_in=32+D, ch_out=D, stride=2),<br>LeakyReLU                                                                 | conv_1                                | $H \times W \times D$                            |
| conv_2       | conv_2d(3×3, ch_in=3+D, ch_out=3+D), LeakyReLU<br>conv_2d(3×3, ch_in=3+D, ch_out=D), LeakyReLU<br>conv_2d(3×3, ch_in=D, ch_out=D) | concat(trans_conv_1, $I_{ref}$ )      | $H \times W \times D$                            |
| Output       | Upsampled and refined cost_volume                                                                                                 |                                       | $H \times W \times D$                            |

Table 6: D-Net structure. The structure is taken from [1]

| Name                          | Components                                                                                                             | Input       | Output dimension                              |                                               |
|-------------------------------|------------------------------------------------------------------------------------------------------------------------|-------------|-----------------------------------------------|-----------------------------------------------|
| Input                         | Input frame                                                                                                            |             | $H \times W \times 3$                         |                                               |
| <b>CNN Layers</b>             |                                                                                                                        |             |                                               |                                               |
| conv0_1                       | conv_2d( $3 \times 3$ , ch_in=3, ch_out=32, stride=2), ReLU                                                            | Input       | $\frac{1}{2}H \times \frac{1}{2}W \times 32$  |                                               |
| conv0_2                       | conv_2d( $3 \times 3$ , ch_in=32, ch_out=32), ReLU                                                                     | conv0_1     | $\frac{1}{2}H \times \frac{1}{2}W \times 32$  |                                               |
| conv0_3                       | conv_2d( $3 \times 3$ , ch_in=32, ch_out=32), ReLU                                                                     | conv0_2     | $\frac{1}{2}H \times \frac{1}{2}W \times 32$  |                                               |
| conv1                         | conv_2d( $3 \times 3$ , ch_in=32, ch_out=32), ReLU<br>conv_2d( $3 \times 3$ , ch_in=32, ch_out=32)                     | $\times 3$  | conv0_2                                       | $\frac{1}{2}H \times \frac{1}{2}W \times 32$  |
| conv1_1                       | conv_2d( $3 \times 3$ , ch_in=32, ch_out=64, stride=2), ReLU                                                           | conv1       | $\frac{1}{4}H \times \frac{1}{4}W \times 64$  |                                               |
| conv2                         | conv_2d( $3 \times 3$ , ch_in=64, ch_out=64), ReLU<br>conv_2d( $3 \times 3$ , ch_in=64, ch_out=64)                     | $\times 15$ | conv1_1                                       | $\frac{1}{4}H \times \frac{1}{4}W \times 64$  |
| conv2_1                       | conv_2d( $3 \times 3$ , ch_in=64, ch_out=128), ReLU                                                                    | conv2       | $\frac{1}{4}H \times \frac{1}{4}W \times 128$ |                                               |
| conv3                         | conv_2d( $3 \times 3$ , ch_in=128, ch_out=128), ReLU<br>conv_2d( $3 \times 3$ , ch_in=128, ch_out=128)                 | $\times 2$  | conv2_1                                       | $\frac{1}{4}H \times \frac{1}{4}W \times 128$ |
| conv4                         | conv_2d( $3 \times 3$ , ch_in=128, ch_out=128, dila=2), ReLU<br>conv_2d( $3 \times 3$ , ch_in=128, ch_out=128, dila=2) | $\times 3$  | conv3                                         | $\frac{1}{4}H \times \frac{1}{4}W \times 128$ |
| <b>Spatial Pyramid Layers</b> |                                                                                                                        |             |                                               |                                               |
| branch1                       | avg_pool( $64 \times 64$ , stride=64)<br>conv_2d( $1 \times 1$ , ch_in=128, ch_out=32), ReLU<br>bilinear interpolation | conv4       | $\frac{1}{4}H \times \frac{1}{4}W \times 32$  |                                               |
| branch2                       | avg_pool( $32 \times 32$ , stride=32)<br>conv_2d( $1 \times 1$ , ch_in=128, ch_out=32), ReLU<br>bilinear interpolation | conv4       | $\frac{1}{4}H \times \frac{1}{4}W \times 32$  |                                               |
| branch3                       | avg_pool( $16 \times 16$ , stride=16)<br>conv_2d( $1 \times 1$ , ch_in=128, ch_out=32), ReLU<br>bilinear interpolation | conv4       | $\frac{1}{4}H \times \frac{1}{4}W \times 32$  |                                               |
| branch4                       | avg_pool( $8 \times 8$ , stride=8)<br>conv_2d( $1 \times 1$ , ch_in=128, ch_out=32), ReLU<br>bilinear interpolation    | conv4       | $\frac{1}{4}H \times \frac{1}{4}W \times 32$  |                                               |
| concat                        | concat(branch1, branch2, branch3, branch4, conv2, conv4)                                                               |             | $\frac{1}{4}H \times \frac{1}{4}W \times 320$ |                                               |
| fusion                        | conv_2d( $3 \times 3$ , ch_in=320, ch_out=128), ReLU<br>conv_2d( $1 \times 1$ , ch_in=128, ch_out=64), ReLU            | concat      | $\frac{1}{4}H \times \frac{1}{4}W \times 64$  |                                               |
| Output                        | The extracted image feature from the fusion layer                                                                      |             | $\frac{1}{4}H \times \frac{1}{4}W \times 64$  |                                               |

## References

- [1] J.-R. Chang and Y.-S. Chen. Pyramid stereo matching network. In *IEEE Conference on Computer Vision and Pattern Recognition (CVPR)*, pages 5410–5418, 2018. 3
- [2] D. Eigen, C. Puhrsch, and R. Fergus. Depth map prediction from a single image using a multi-scale deep network. In *Advances in Neural Information Processing Systems (NIPS)*, 2014. 2
- [3] H. Fu, M. Gong, C. Wang, K. Batmanghelich, and D. Tao. Deep ordinal regression network for monocular depth estimation. In *IEEE Conference on Computer Vision and Pattern Recognition (CVPR)*, 2018. 2
- [4] A. Geiger, P. Lenz, and R. Urtasun. Are we ready for autonomous driving? The KITTI vision benchmark suite. In *IEEE Conference on Computer Vision and Pattern Recognition (CVPR)*, pages 3354–3361, 2012. 2
- [5] C. Godard, O. Mac Aodha, and G. J. Brostow. Unsupervised monocular depth estimation with left-right consistency. In *IEEE Conference on Computer Vision and Pattern Recognition (CVPR)*, 2017. 2
- [6] J. Shotton, B. Glocker, C. Zach, S. Izadi, A. Criminisi, and A. Fitzgibbon. Scene coordinate regression forests for camera relocalization in RGB-D images. In *IEEE Conference on Computer Vision and Pattern Recognition (CVPR)*, 2013. 2
- [7] B. Ummenhofer, H. Zhou, J. Uhrig, N. Mayer, E. Ilg, A. Dosovitskiy, and T. Brox. DeMoN: Depth and motion network for learning monocular stereo. In *IEEE Conference on Computer Vision and Pattern Recognition (CVPR)*, 2017. 2
- [8] Y. Yao, Z. Luo, S. Li, T. Fang, and L. Quan. MVSNNet: Depth inference for unstructured multi-view stereo. In *European Conference on Computer Vision (ECCV)*, 2018. 2
